# Supplementary material
Source: publisher site journal article supplement (https://www.spandidos-publications.com/2723/downloadSupplementary)

Figure S1. Proof of successful transfection. OCT1 (SLC22A1) and OCT3 (SLC22A3) mRNA expression levels in stably OCT1 (pcDNAOCT1)- and OCT3 (pcDNAOCT3)-transfected HepG2 (n=4) and HuH7 (n=4) cells in comparison to empty vector-transfected tumour cells after 48 h. \*P<0.05, \*\*P<0.01.

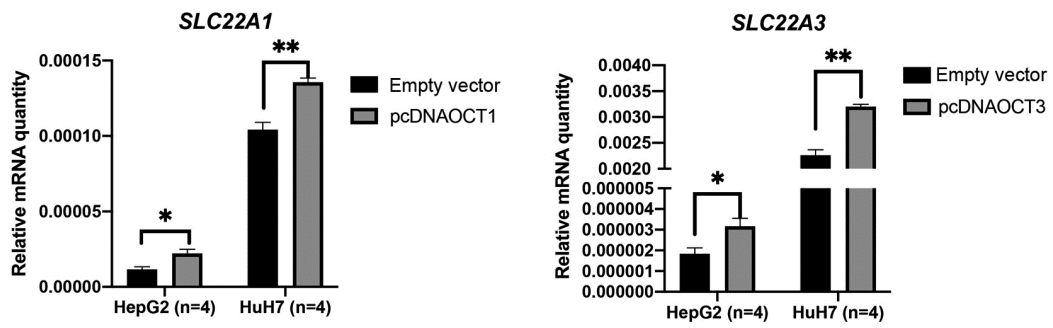







Figure S5. Magnified immunofluorescence. Magnified immunofluorescence (magnification, x40) in primary murine hepatocytes of *Oct3<sup>-/-</sup>* and WT mice after 48 h treatment with 150  $\mu$ M quinine. *Oct3<sup>-/-</sup>*, *Oct3*-knockout (FVB.Slc22a3tm10pb), WT, wild-type.

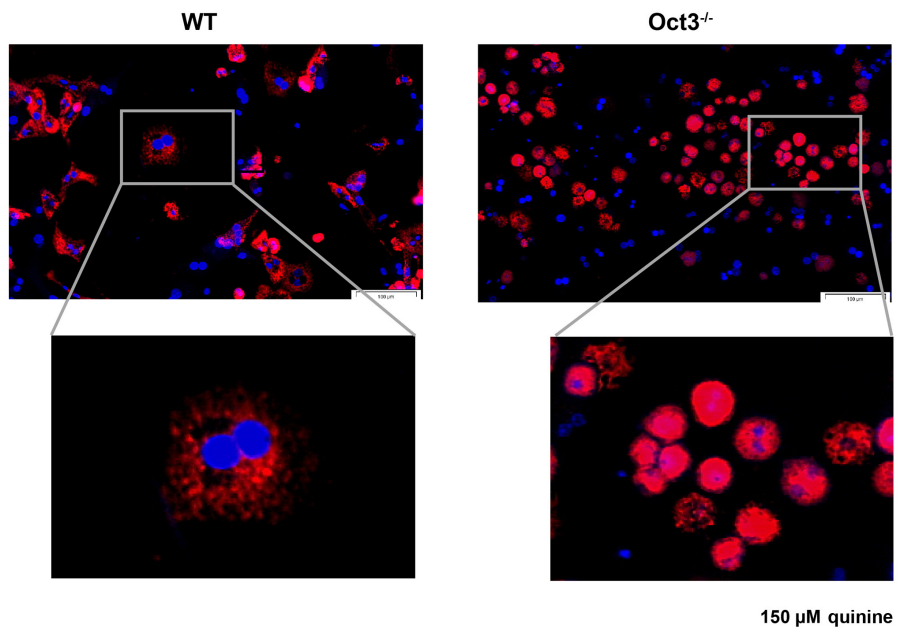

Supplement: Supplementary file 1 [file downloadSupplementary]
